# Supplementary material for: Prevalence of somatic mitochondrial mutations and spatial distribution of mitochondria in non-small cell lung cancer
Source: PubMed Central journal article supplement — Br J Cancer. 2017 May 30;117(2):220–6. doi: 10.1038/bjc.2017.155 (PMC5520508; doi:10.1038/bjc.2017.155), 2017-05-30
Supplement: bjc2017155x1.pdf [file bjc2017155x1.pdf]

**Suppl. 1:** Clinicopathological parameters of the ADC patients included in the analysis of somatic mtDNA mutations

| Patient | Sex | Age | pTNM                        | Approach                                                        |
|---------|-----|-----|-----------------------------|-----------------------------------------------------------------|
| 1       | w   | 66  | pT4, pN0 (0/25), Mx         | Determination of somatic mitochondrial mutations                |
| 2       | m   | 66  | pT2, pN0 (0/24), Mx         |                                                                 |
| 3       | m   | 66  | pT2, pN0(0/19), Mx,         |                                                                 |
| 4       | w   | 67  | pT2, pN1 (1/19), Mx         |                                                                 |
| 5       | m   | 56  | pT2, pN1 (6/46), Mx         |                                                                 |
| 6       | w   | 80  | pT2-, pN0 (0/21), Mx        |                                                                 |
| 7       | w   | 66  | pT2, pN0 (0/20), Mx         |                                                                 |
| 8       | w   | 69  | pT4, pN2 (5/20), Mx         |                                                                 |
| 9       | m   | 75  | pT2, pN0 (0/25), Mx         |                                                                 |
| 10      | m   | 56  | pT2a, pN2 (4/38), pM1a(PLE) |                                                                 |
| 11      | m   | 74  | pT2b, pN1 (4/34), Mx        |                                                                 |
| 12      | w   | 76  | pT1a, pN0(0/9), Mx          |                                                                 |
| 13      | w   | 49  | pT4, pN2 (15/25), Mx        |                                                                 |
| 14      | w   | 69  | pT2a, pN0 (0/28), Mx        |                                                                 |
| 15      | m   | 69  | pT2a, pN0 (0/25), Mx        |                                                                 |
| 16      | w   | 73  | pT1b, pNx, Mx               |                                                                 |
| 17      | w   | 69  | pT2a, pN0 (0/48), Mx        |                                                                 |
| 18      | w   | 73  | pT1b, pN0 (0/32), Mx        |                                                                 |
| 19      | m   | 63  | pT2, pN0 (0/9), Mx          |                                                                 |
| 20      | w   | 57  | pT2a, pN0 (0/26), Mx        |                                                                 |
| 21      | w   | 75  | pT3, pN1 (1/31), Mx         |                                                                 |
| 22      | m   | 51  | pT2a, pN1 (7/39), Mx        |                                                                 |
| 23      | w   | 60  | pT2a, pN2 (3/16), Mx        |                                                                 |
| 24      | w   | 59  | pT2a, pN0 (0/26), Mx        |                                                                 |
| 25      | w   | 68  | pT2a, pN0 (0/19), Mx        |                                                                 |
| 26      | m   | 60  | pT2b, pN1 (4/38), Mx        |                                                                 |
| I       | m   | 51  | pT2a, pN0 (0/21), Mx        | Determination of the spatial distribution of mtDNA copy numbers |
| II      | w   | 68  | pT4, pN2 (17/31), Mx        |                                                                 |
| III     | w   | 60  | pT2a, pN2 (3/16), Mx        |                                                                 |
| IV      | w   | 59  | pT2a, pN0 (0/26), Mx        |                                                                 |
| IX      | m   | 66  | pT1a, pN0 (0/22), Mx        |                                                                 |
| V       | w   | 68  | pT2a, pN0 (0/19), Mx        |                                                                 |
| VI      | m   | 60  | pT2b, pN1 (4/38), Mx        |                                                                 |
| VII     | w   | 66  | pT2a, pN1 (6/30), Mx        |                                                                 |
| VIII    | m   | 70  | pT1ami, pN0 (0/31), Mx      |                                                                 |
| X       | w   | 54  | pT3, pN2 (1/ 17), Mx        |                                                                 |
| XI      | m   | 74  | pT3, pN0 (0/32), Mx         |                                                                 |
| XII     | m   | 63  | pT2a, pN0 (0/ 39), Mx       |                                                                 |
| XIII    | m   | 81  | pT2b, pN2 (5/49), Mx        |                                                                 |
| XIV     | m   | 63  | pT3, pN2 (7/35), Mx         |                                                                 |
| XV      | m   | 57  | pT3, pN0 (0/25), Mx         |                                                                 |
| XVI     | m   | 66  | pT3, pN1 (1/48), Mx         |                                                                 |
