# Supplementary material for: Prevalence of somatic mitochondrial mutations and spatial distribution of mitochondria in non-small cell lung cancer
Source: PubMed Central journal article supplement — Br J Cancer. 2017 May 30;117(2):220–6. doi: 10.1038/bjc.2017.155 (PMC5520508; doi:10.1038/bjc.2017.155), 2017-05-30
Supplement: bjc2017155x2.pdf [file bjc2017155x2.pdf]

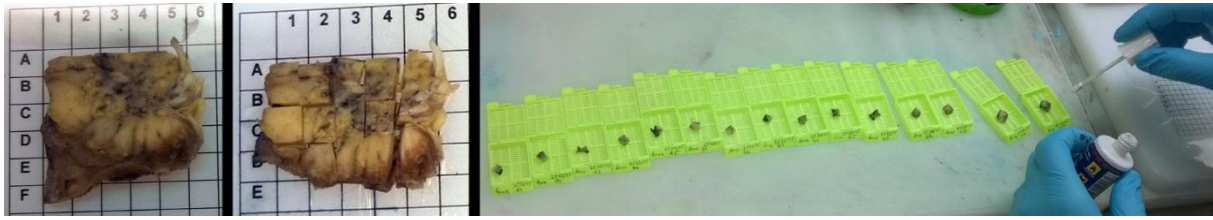

**Suppl. 2:** From left to right: Tumor section on 5x5 mm grid / Tumor section segmented corresponding to the grid / Directed embedment of the single segments.
