# Supplementary material for: Prevalence of somatic mitochondrial mutations and spatial distribution of mitochondria in non-small cell lung cancer
Source: PubMed Central journal article supplement — Br J Cancer. 2017 May 30;117(2):220–6. doi: 10.1038/bjc.2017.155 (PMC5520508; doi:10.1038/bjc.2017.155), 2017-05-30
Supplement: bjc2017155x3.pdf [file bjc2017155x3.pdf]

**Suppl. 3: HALO Configuration Settings**

| <b>HALO Configuration Settings</b>  | <b>Position</b>         |
|-------------------------------------|-------------------------|
| Nuclear stain                       | 0.644, 0.716, 0.267     |
| Positive stain                      | 0.268, 0.570, 0.776     |
| Stain localization                  | Cytoplasm               |
| Minimum Tissue OD                   | 0.037                   |
| Minimum nuclear contrast threshold  | 0.525                   |
| Minimum nuclear OD                  | 0.095                   |
| Nuclear size                        | min: 9.800, max: 571.00 |
| Minimum nuclear roundness           | 0                       |
| Fill nuclear holes                  | "FALSE"                 |
| Nuclear Segmentation Aggressiveness | 0.28                    |
| Maximum cytoplasm radius            | 5                       |
| Stain 1 min OD                      | 0.112, 0.287, 0.445     |
