# Supplementary material for: Prevalence of somatic mitochondrial mutations and spatial distribution of mitochondria in non-small cell lung cancer
Source: PubMed Central journal article supplement — Br J Cancer. 2017 May 30;117(2):220–6. doi: 10.1038/bjc.2017.155 (PMC5520508; doi:10.1038/bjc.2017.155), 2017-05-30
Supplement: bjc2017155x4.pdf [file bjc2017155x4.pdf]

**Suppl. 4: Table of Identified Somatic Mitochondrial Mutations**

| Case | Position | Reference | Variation | Coverage | Allele Frequency | Region / Gene | AA_Ref | AA_Var |
|------|----------|-----------|-----------|----------|------------------|---------------|--------|--------|
| 1    | 1923     | C         | T         | 854      | 8.4              | 16S rRNA      | -      | -      |
| 1    | 2733     | G         | A         | 1069     | 6.5              | 16S rRNA      | -      | -      |
| 1    | 3842     | G         | A         | 651      | 6.8              | ND1           | W      | Stop   |
| 1    | 4127     | G         | A         | 693      | 5.5              | ND1           | R      | Q      |
| 1    | 9645     | G         | A         | 6531     | 19.1             | COX3          | A      | T      |
| 1    | 10457    | T         | C         | 536      | 3.9              | tRNA-Arg      | -      | -      |
| 1    | 14960    | G         | A         | 1984     | 15.9             | CYTB          | D      | N      |
| 2    | 3922     | G         | A         | 947      | 4.2              | ND1           | E      | K      |
| 2    | 5591     | G         | A         | 585      | 57.6             | tRNA-Ala      | -      | -      |
| 2    | 7486     | G         | A         | 966      | 5.9              | tRNA-Ser      | -      | -      |
| 2    | 15876    | T         | C         | 1083     | 46.6             | CYTB          | L      | P      |
| 3    | 2701     | G         | A         | 851      | 26.8             | 16S rRNA      | -      | -      |
| 3    | 3002     | G         | A         | 584      | 3.9              | 16S rRNA      | -      | -      |
| 3    | 10851    | G         | A         | 113      | 39.8             | ND4           | S      | N      |
| 4    | 7658     | G         | A         | 1167     | 5.1              | COX2          | D      | N      |
| 5    | 3553     | C         | A         | 146      | 13               | ND1           | L      | I      |
| 5    | 8649     | A         | C         | 959      | 3.9              | ATP6          | R      | R      |
| 5    | 11969    | G         | A         | 1103     | 5.3              | ND4           | A      | T      |
| 5    | 12871    | G         | A         | 2695     | 3.4              | ND5           | D      | N      |
| 6    | 11004    | G         | A         | 1111     | 39.3             | ND4           | R      | H      |
| 6    | 13837    | G         | A         | 831      | 16               | ND5           | A      | T      |
| 7    | -        | -         | -         | -        | -                | -             | -      | -      |
| 8    | 813      | A         | G         | 928      | 3.6              | 12S rRNA      | -      | -      |
| 8    | 825      | T         | A         | 925      | 3.5              | 12S rRNA      | -      | -      |
| 9    | 8649     | A         | C         | 556      | 2.9              | ATP6          | R      | R      |
| 9    | 10839    | C         | T         | 161      | 7.5              | ND4           | T      | I      |
| 9    | 11711    | G         | A         | 2485     | 62.3             | ND4           | A      | T      |
| 10   | 4956     | A         | G         | 1712     | 7.6              | ND2           | M      | V      |
| 10   | 5164     | G         | A         | 371      | 84.1             | ND2           | R      | H      |
| 10   | 9565     | G         | A         | 593      | 8.4              | COX3          | G      | D      |
| 10   | 10522    | G         | A         | 2552     | 9.2              | ND4L          | G      | D      |
| 11   | 1289     | G         | A         | 565      | 3.4              | 12S rRNA      | -      | -      |
| 11   | 1773     | AT        | -         | 1245     | 6.9              | 16S rRNA      | -      | -      |
| 11   | 8873     | G         | A         | 417      | 56.6             | ATP6          | G      | D      |
| 11   | 9316     | T         | C         | 639      | 9.4              | COX3          | F      | S      |
| 11   | 15431    | G         | A         | 416      | 5.8              | CYTB          | A      | T      |
| 11   | 16284    | A         | G         | 240      | 16.2             | DLOOP         | -      | -      |
| 11   | 16390    | G         | A         | 571      | 48.3             | DLOOP         | -      | -      |
| 12   | 3000     | A         | G         | 448      | 25.2             | 16S rRNA      | -      | -      |
| 12   | 5224     | G         | A         | 541      | 7                | ND2           | G      | E      |
| 12   | 5902     | T         | C         | 1670     | 9.3              | non-coding    | -      | -      |
| 12   | 6825     | G         | A         | 766      | 15.3             | COX1          | A      | T      |
| 12   | 12349    | A         | G         | 265      | 16.2             | ND5           | T      | A      |
| 12   | 12892    | T         | C         | 1772     | 10.6             | ND5           | L      | L      |
| 13   | 1552     | G         | A         | 612      | 9.3              | 12S rRNA      | -      | -      |
| 13   | 2701     | G         | A         | 778      | 3.3              | 16S rRNA      | -      | -      |
| 13   | 8649     | A         | C         | 487      | 4.3              | ATP6          | R      | R      |
| 13   | 11690    | G         | A         | 1136     | 8.5              | ND4           | G      | S      |
| 14   | 5930     | T         | C         | 984      | 3.5              | COX1          | S      | S      |
| 14   | 10522    | G         | A         | 378      | 10.3             | ND4L          | G      | E      |
| 14   | 13352    | T         | C         | 162      | 56.2             | ND5           | L      | P      |
| 14   | 14612    | G         | A         | 126      | 84.1             | ND6           | S      | K      |
| 14   | 16390    | G         | A         | 377      | 80.4             | DLOOP         | -      | -      |
| 15   | 11390    | G         | A         | 182      | 3.3              | ND4           | G      | R      |
| 15   | 16389    | G         | A         | 437      | 7.8              | DLOOP         | -      | -      |
| 16   | 1334     | G         | A         | 550      | 3.1              | 12S rRNA      | -      | -      |
| 16   | 3433     | T         | C         | 568      | 13.2             | ND1           | Y      | H      |
| 16   | 8852     | G         | A         | 408      | 27.9             | ATP6          | W      | Stop   |
| 16   | 9774     | G         | A         | 1165     | 5.7              | COX3          | D      | N      |
| 16   | 11072    | T         | C         | 347      | 6.1              | ND4           | S      | P      |
| 16   | 13268    | G         | A         | 424      | 13.9             | ND5           | G      | E      |
| 16   | 16488    | C         | T         | 444      | 10.8             | DLOOP         | -      | -      |

| Case | Position | Reference | Variation | Coverage | Allele Frequency | Region / Gene | AA_Ref | AA_Var |
|------|----------|-----------|-----------|----------|------------------|---------------|--------|--------|
| 17   | -        | -         | -         | -        | -                | -             | -      | -      |
| 18   | 182      | C         | T         | 254      | 8.7              | DLOOP         | -      | -      |
| 18   | 15718    | T         | C         | 1360     | 3.4              | CYTB          | L      | L      |
| 18   | 16278    | C         | T         | 222      | 63.5             | DLOOP         | -      | -      |
| 19   | 12235    | T         | C         | 448      | 12.7             | tRNA-Ser      | -      | -      |
| 19   | 12635    | T         | C         | 207      | 8.7              | ND5           | I      | T      |
| 19   | 12925    | G         | A         | 512      | 10.4             | ND5           | D      | N      |
| 19   | 13393    | G         | A         | 220      | 22.3             | ND5           | E      | K      |
| 19   | 14207    | G         | A         | 230      | 8.7              | ND6           | T      | N      |
| 20   | 292      | T         | C         | 417      | 6                | DLOOP         | -      | -      |
| 20   | 1623     | G         | A         | 556      | 3.1              | tRNA-Val      | -      | -      |
| 20   | 3688     | G         | A         | 613      | 3.6              | ND1           | A      | T      |
| 20   | 6129     | G         | A         | 364      | 19               | COX1          | G      | R      |
| 20   | 8854     | G         | A         | 456      | 3.1              | ATP6          | A      | T      |
| 20   | 8969     | G         | A         | 274      | 23               | ATP6          | S      | N      |
| 20   | 12974    | T         | C         | 490      | 7.8              | ND5           | L      | P      |
| 21   | 1080     | A         | C         | 437      | 54.7             | 12S rRNA      | -      | -      |
| 21   | 7380     | G         | A         | 127      | 15               | COX1          | E      | K      |
| 22   | 7        | A         | G         | 691      | 59.6             | DLOOP         | -      | -      |
| 22   | 2211     | T         | C         | 638      | 20.2             | 16S rRNA      | -      | -      |
| 22   | 16261    | C         | T         | 217      | 20.7             | DLOOP         | -      | -      |
| 23   | 66       | G         | A         | 1011     | 20.2             | DLOOP         | -      | -      |
| 23   | 824      | T         | C         | 977      | 23.2             | 12S rRNA      | -      | -      |
| 23   | 3082     | G         | A         | 819      | 9.8              | 16S rRNA      | -      | -      |
| 23   | 3967     | G         | C         | 905      | 8.1              | ND1           | A      | P      |
| 23   | 4298     | G         | A         | 1367     | 3.3              | tRNA-Ile      | -      | -      |
| 23   | 5215     | T         | C         | 465      | 45.7             | ND2           | L      | P      |
| 23   | 6285     | G         | A         | 1661     | 6.3              | COX1          | V      | I      |
| 23   | 14864    | T         | C         | 662      | 28.4             | CYTB          | C      | R      |
| 23   | 16390    | G         | A         | 956      | 6.6              | DLOOP         | -      | -      |
| 24   | 1024     | G         | A         | 976      | 25.1             | 12S rRNA      | -      | -      |
| 24   | 2149     | G         | A         | 714      | 54.6             | 16S rRNA      | -      | -      |
| 24   | 2647     | G         | A         | 2257     | 20.9             | 16S rRNA      | -      | -      |
| 24   | 4714     | G         | A         | 924      | 17.6             | ND2           | G      | E      |
| 24   | 7805     | G         | A         | 604      | 7.1              | COX2          | V      | I      |
| 24   | 7901     | T         | C         | 1453     | 3.4              | COX2          | W      | R      |
| 24   | 16180    | A         | G         | 274      | 14.2             | DLOOP         | -      | -      |
| 25   | 4752     | T         | C         | 127      | 11               | ND2           | S      | P      |
| 25   | 6322     | G         | A         | 1190     | 19.5             | COX1          | G      | E      |
| 25   | 8950     | G         | A         | 181      | 6.1              | ATP6          | V      | I      |
| 26   | 1308     | T         | C         | 1388     | 10.9             | 12S rRNA      | -      | -      |
| 26   | 1611     | G         | A         | 1448     | 3.3              | tRNA-Val      | -      | -      |
| 26   | 10230    | G         | A         | 456      | 3.3              | ND3           | V      | M      |
| 26   | 11438    | G         | A         | 587      | 11.1             | ND4           | G      | R      |
| 26   | 11747    | G         | A         | 1294     | 71.8             | ND4           | A      | T      |
