# Supplementary material for: Prevalence of somatic mitochondrial mutations and spatial distribution of mitochondria in non-small cell lung cancer
Source: PubMed Central journal article supplement — Br J Cancer. 2017 May 30;117(2):220–6. doi: 10.1038/bjc.2017.155 (PMC5520508; doi:10.1038/bjc.2017.155), 2017-05-30
Supplement: bjc2017155x5.pdf [file bjc2017155x5.pdf]

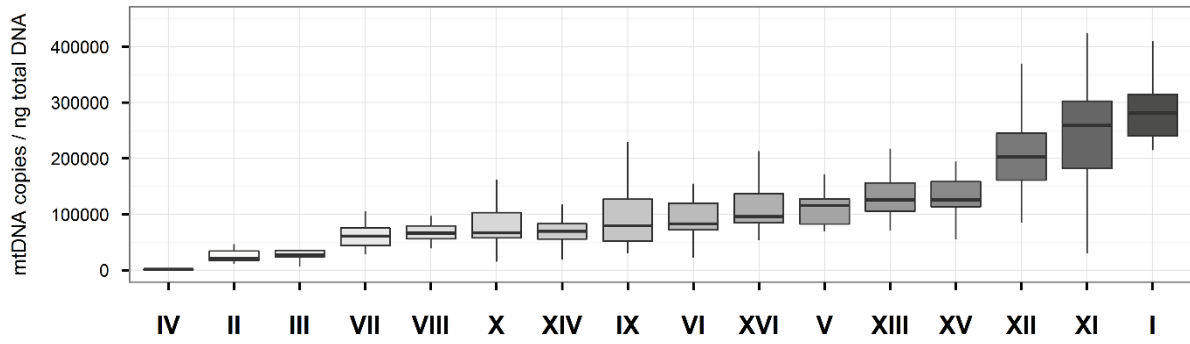

**Suppl. 5:** Variations of the mitochondrial load in central sections of 16 adenocarcinoma (I - XVI). Following segmentation of the central sections, the mtDNA copy numbers per ng total DNA in each segment were determined by real-time PCR quantification. For absolute numbers see **Suppl. 6**.
