# Supplementary material for: Prevalence of somatic mitochondrial mutations and spatial distribution of mitochondria in non-small cell lung cancer
Source: PubMed Central journal article supplement — Br J Cancer. 2017 May 30;117(2):220–6. doi: 10.1038/bjc.2017.155 (PMC5520508; doi:10.1038/bjc.2017.155), 2017-05-30
Supplement: bjc2017155x7.pdf [file bjc2017155x7.pdf]

**Suppl. 7:** Immunohistochemical analysis of the mitochondrial load in 171 adenocarcinoma (ADC) and 145 squamous cell carcinoma (SQCC) punch samples. ADC samples were discriminated according to the predominant histological growth pattern. Shown are the minimum (min), first quantile (1st Q), median, third quantile (3rd Q) and maximum H scores separated by tumor stroma (-S) and tumor (-T), respectively.

| <b>Entity</b>    | <b>n</b> | <b>Min</b> | <b>1<sup>st</sup> Q</b> | <b>Median</b> | <b>3<sup>rd</sup> Q</b> | <b>Max</b> |
|------------------|----------|------------|-------------------------|---------------|-------------------------|------------|
| Lepidic-S        | 7        | 101.2      | 112.1                   | 118.2         | 159.5                   | 166.4      |
| Lepidic-T        |          | 173.3      | 209.6                   | 245.7         | 250.9                   | 279.6      |
| Acinar-S         | 62       | 93.45      | 121.1                   | 133.2         | 155.5                   | 208.6      |
| Acinar-T         |          | 162        | 212.8                   | 22.87         | 249.4                   | 269.8      |
| Papillary-S      | 31       | 95.92      | 123                     | 133.9         | 150.3                   | 177.4      |
| Papillary-T      |          | 157.7      | 211.9                   | 231.2         | 242.8                   | 284.8      |
| Solid-S          | 55       | 49.39      | 117.3                   | 135.8         | 149.5                   | 227.5      |
| Solid-T          |          | 185.4      | 220.7                   | 231.6         | 245.8                   | 284.7      |
| Micropapillary-S | 16       | 70.16      | 111.3                   | 119.9         | 136.7                   | 187.2      |
| Micropapillary-T |          | 174.9      | 200.7                   | 219.9         | 226.7                   | 261.7      |
| ADC-S            | 171      | 49.39      | 117.3                   | 133.2         | 152.2                   | 227.5      |
| ADC-T            |          | 157.7      | 212.8                   | 228           | 243.6                   | 284.8      |
| SQCC-S           | 145      | 72.28      | 122.5                   | 137.9         | 156.9                   | 218.9      |
| SQCC-T           |          | 178        | 215.5                   | 239.5         | 255.4                   | 282.9      |
