# Supplementary material for: Prevalence of somatic mitochondrial mutations and spatial distribution of mitochondria in non-small cell lung cancer
Source: PubMed Central journal article supplement — Br J Cancer. 2017 May 30;117(2):220–6. doi: 10.1038/bjc.2017.155 (PMC5520508; doi:10.1038/bjc.2017.155), 2017-05-30
Supplement: bjc2017155x8.pdf [file bjc2017155x8.pdf]

**Suppl. 8:** Most common types of mutations in the analyzed sample set

| <b>Wild type base</b> | <b>Variant base</b> | <b>Lit-All</b> | <b>Lit-ADC</b> | <b>Lit- SQCC</b> | <b>This Study</b> | <b>Combined</b> |
|-----------------------|---------------------|----------------|----------------|------------------|-------------------|-----------------|
| G                     | A                   | 37 %           | 51 %           | 36 %             | 60 %              | 42 %            |
| T                     | C                   | 20 %           | 18 %           | 14 %             | 21 %              | 20 %            |
| C                     | T                   | 13 %           | 10 %           | 13 %             | 6 %               | 12 %            |
| A                     | G                   | 13 %           | 9 %            | 9 %              | 7 %               | 12 %            |
| Total                 |                     | 84 %           | 88 %           | 71 %             | 94 %              | 86 %            |
